# Supplementary material for: Assessing the thermohaline coherence of mesoscale eddies as described from in situ data
Source: Copernicus journal article supplement (doi:10.5194/os-21-151-2025), 2025-01-27
Supplement: Supplementary file 1 [file os-21-151-2025-supplement.pdf]

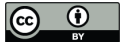

*Supplement of*

## **Assessing the thermohaline coherence of mesoscale eddies as described from in situ data**

**Yan Barabinot et al.**

*Correspondence to:* Yan Barabinot ([yan.barabinot@lmd.ipsl.fr](mailto:yan.barabinot@lmd.ipsl.fr))

The copyright of individual parts of the supplement might differ from the article licence.

## **Contents of this file**

Figures S1 to S16

### **S1. Introduction**

Here are presented 16 figures related to the 25 mesoscale eddies studied in the article. This supplementary material presents the thermohaline anomalies on isopycnals computed using climatological averages. The methodology to obtain these figures has already been detailed in the corresponding article. As described in the article, the horizontal resolution drives uncertainties on computed quantities as well as their shapes. Eddies are grouped by cruise.

## S2. EUREC4A-OA

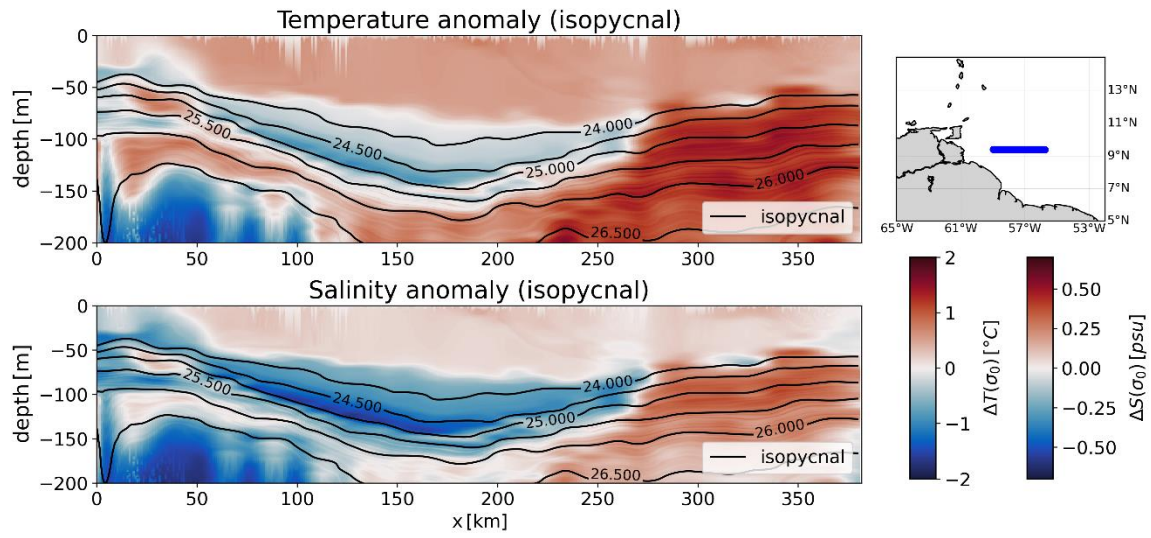

**Figure S1.** AE N°1 sampled during EUREC4A-OA experiment.

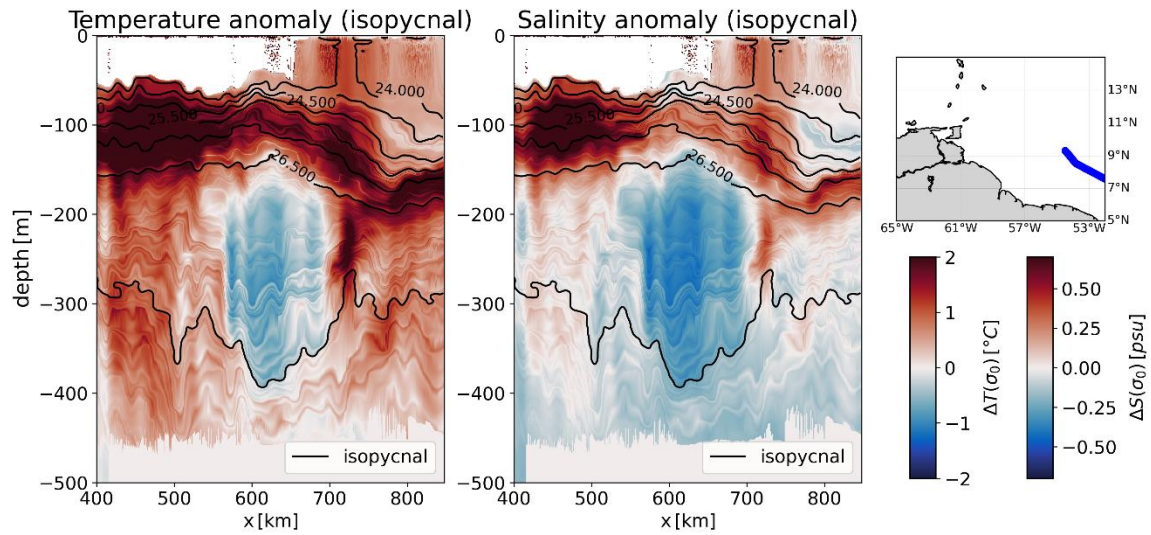

**Figure S2.** AE N°3 sampled during EUREC4A-OA experiment.

### S3. MSM60

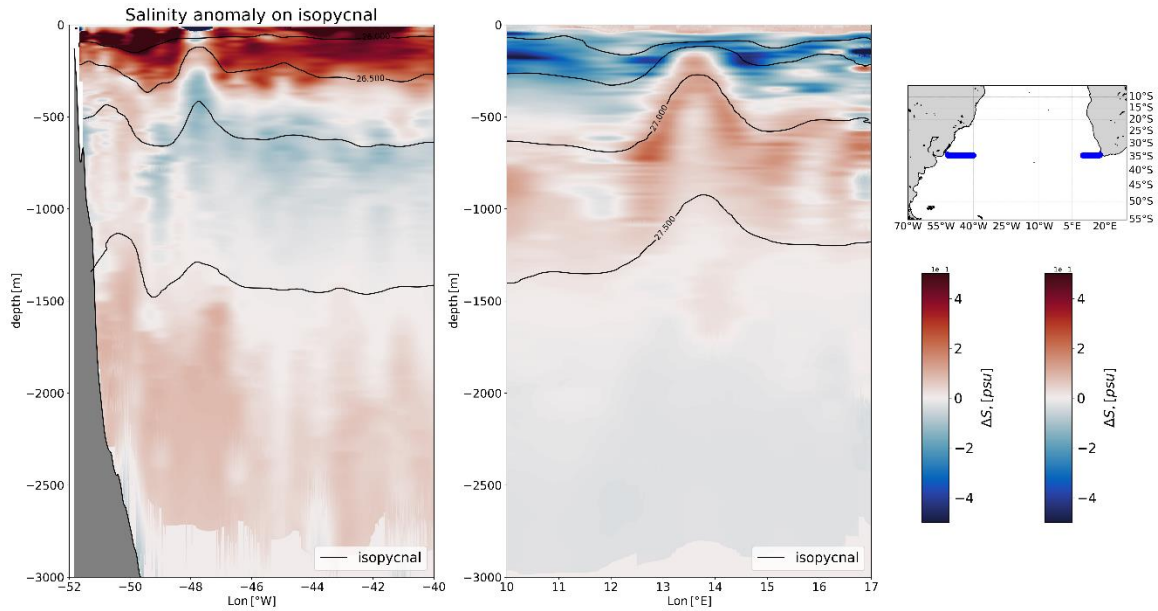

Figure S3. 3 CE N°4, 5 and 6 sampled during MSM60 experiment.

### S4. Physindien 2011

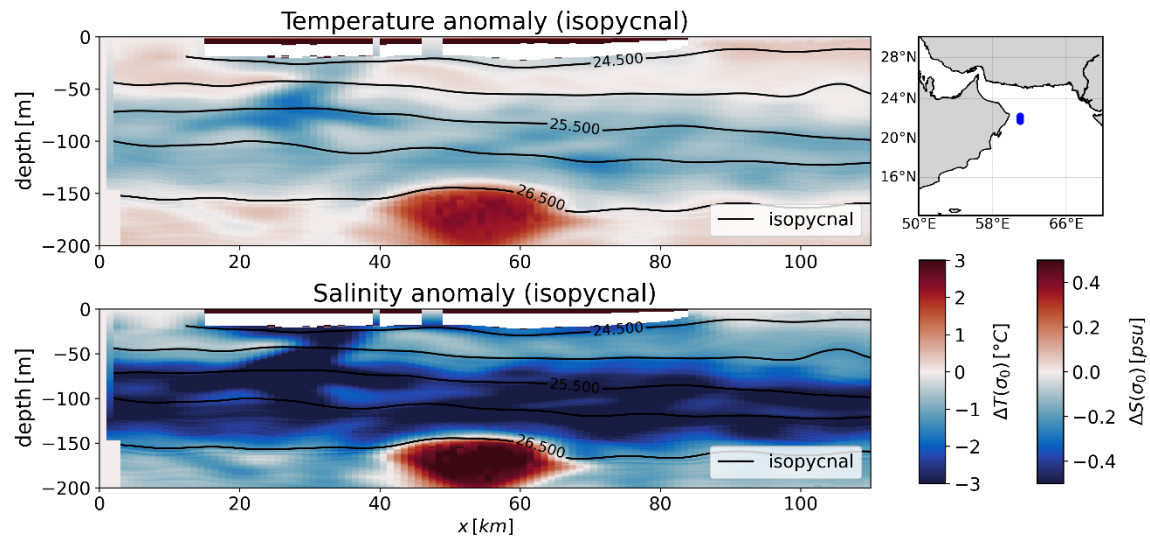

Figure S4. AE N°8 sampled during Physindien 2011 experiment.

## S5. M124

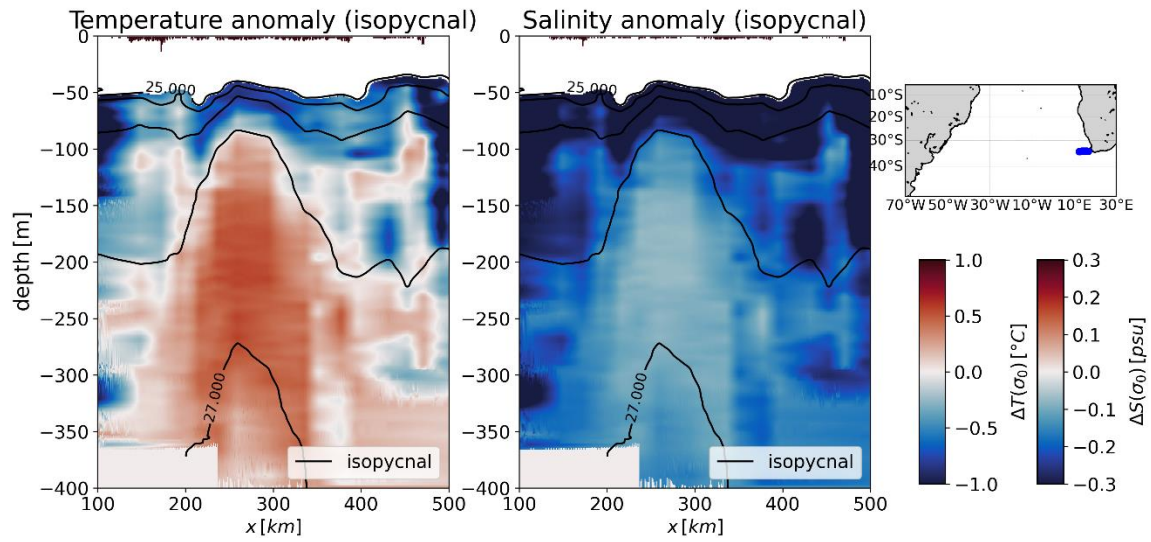

**Figure S5.** CE N°9 sampled during M124 experiment.

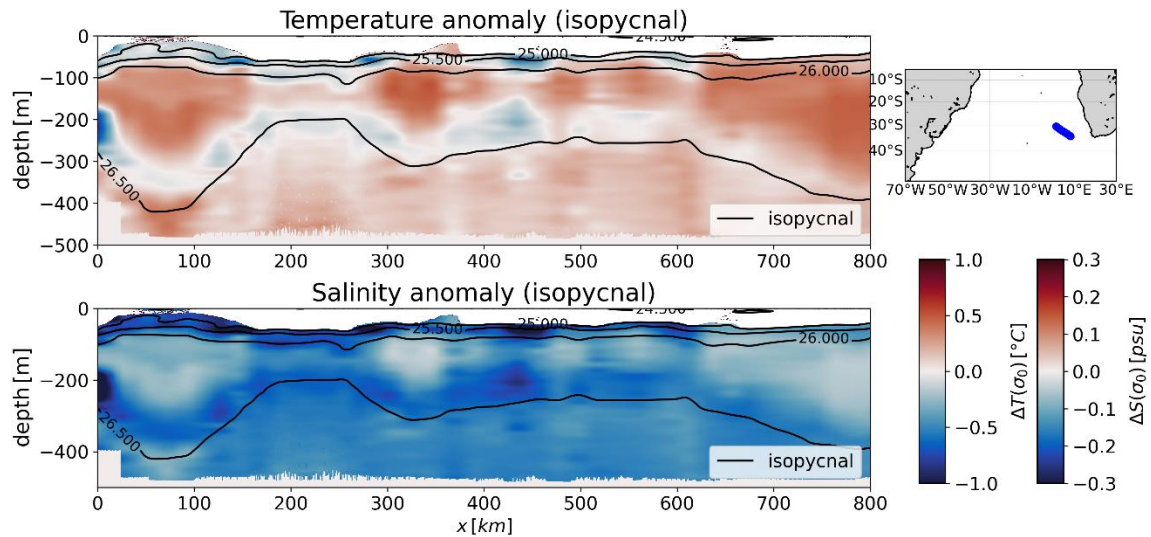

**Figure S6.** AE N°10, 11 and 12 sampled during M124 experiment.



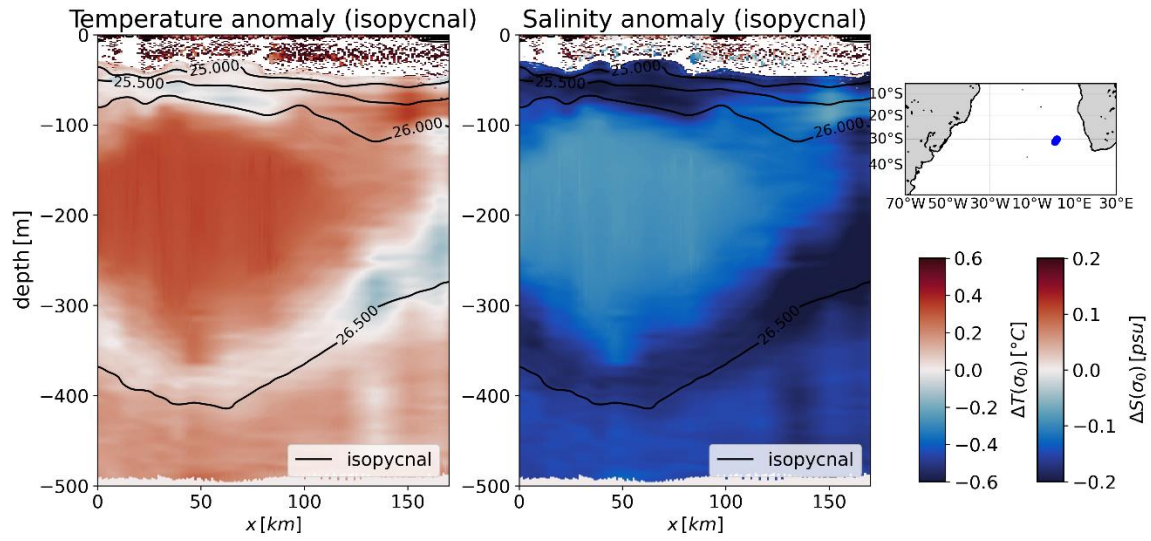

**Figure S7.** AE N°13 sampled during M124 experiment.

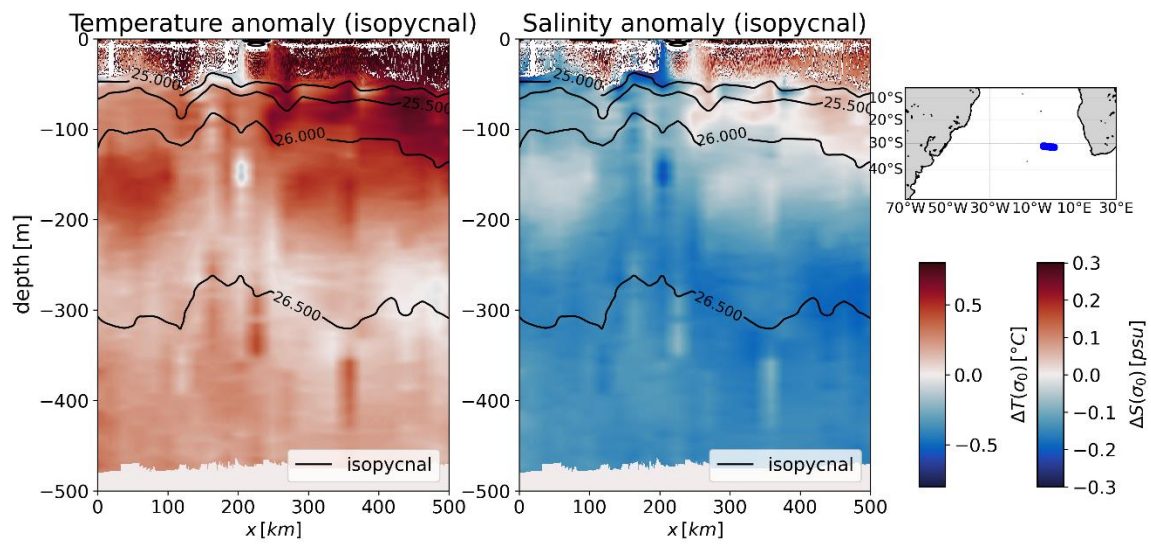

**Figure S8.** AE N°14 and 15 sampled during M124 experiment.

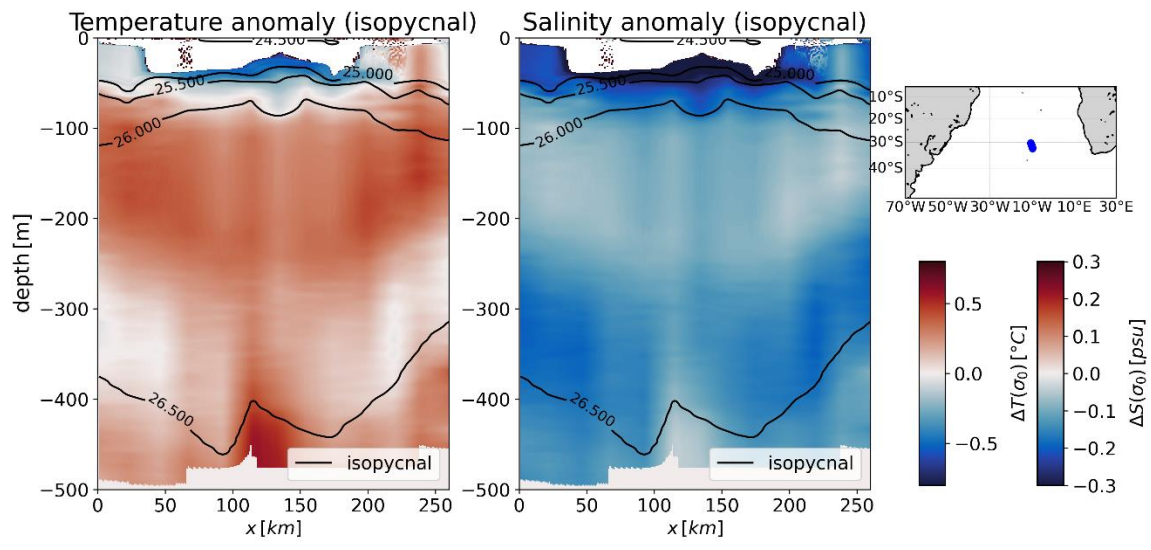

Figure S9. AE N°17 sampled during M124 experiment.

S6. MSM74

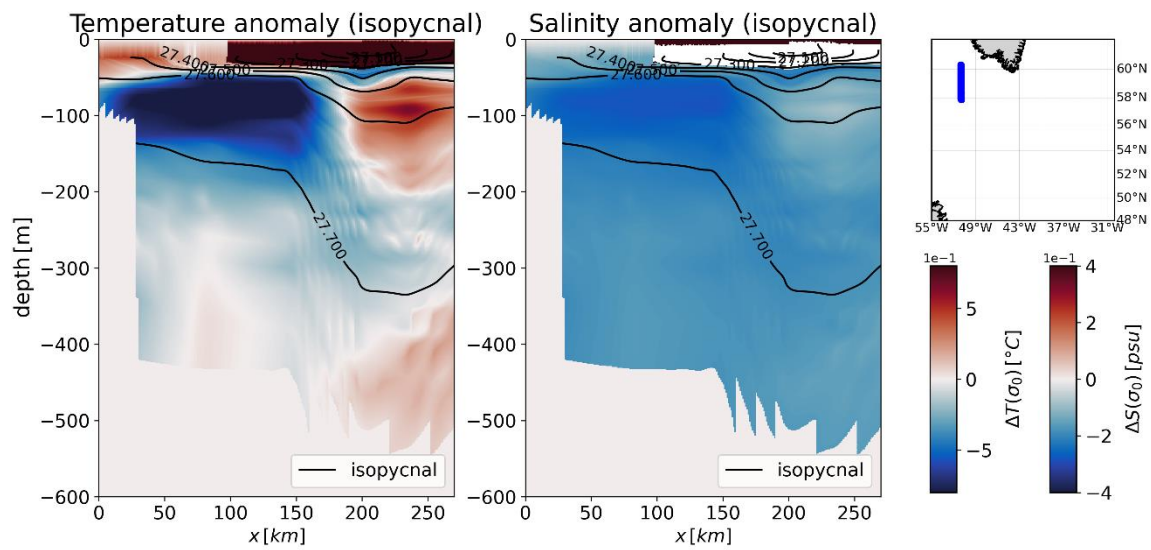

Figure S10. AE N°18 sampled during MSM74 experiment.

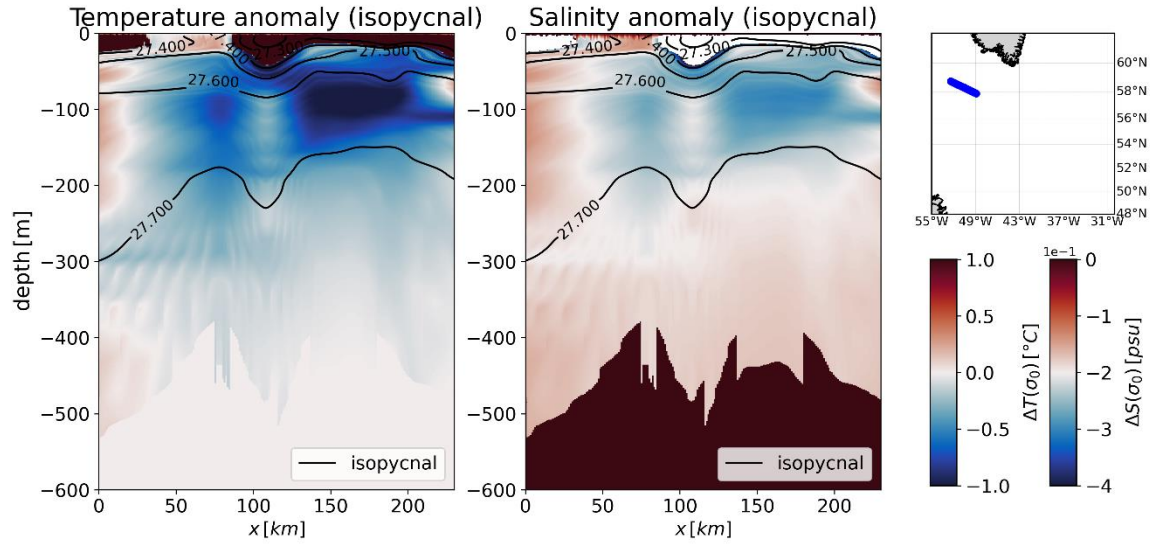

**Figure S11.** AE N°19 and 20 sampled during MSM74 experiment.

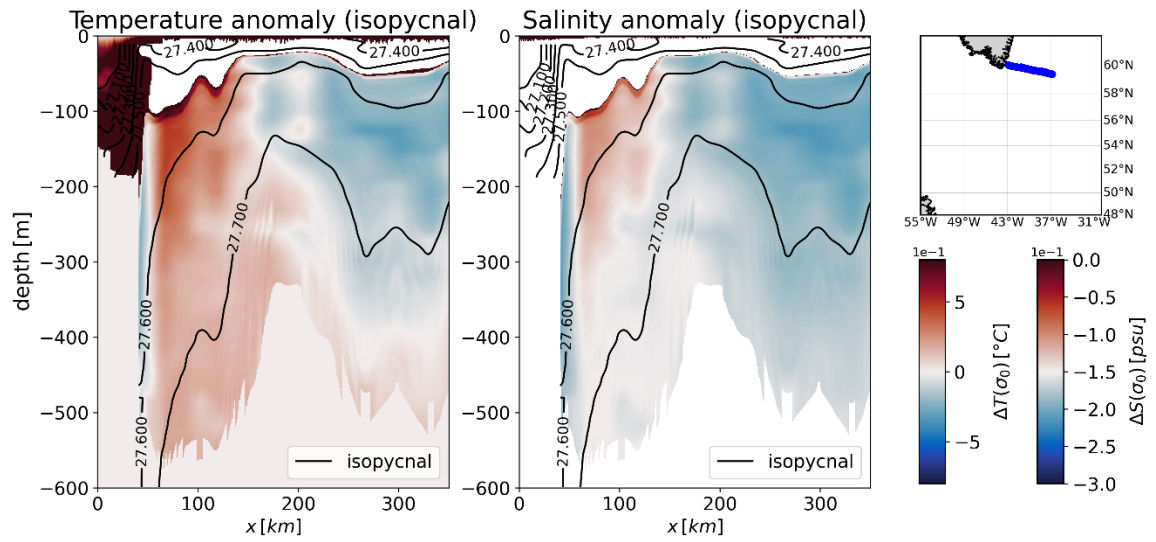

**Figure S12.** CE N°21 and AE N°22 sampled during MSM74 experiment.



## S7. M160

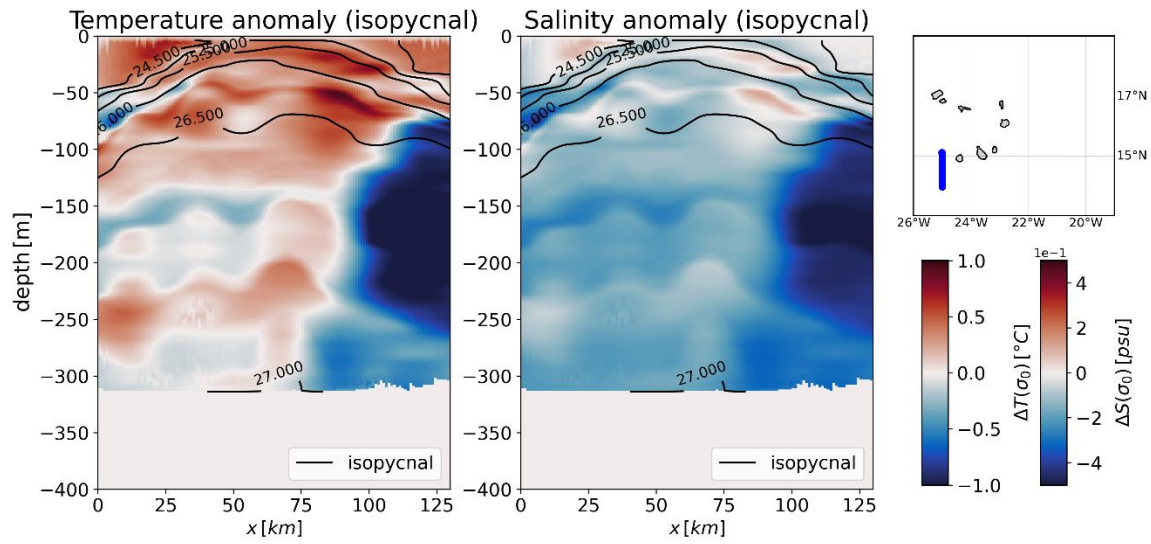

Figure S13. CE N°23 sampled during M160 experiment.

## S8. KB2017606

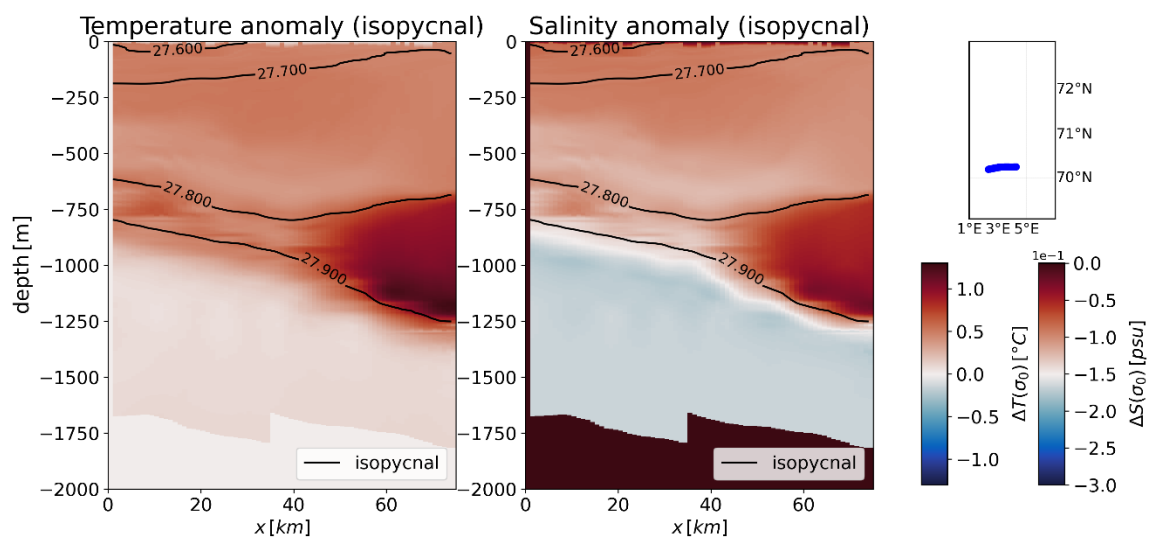

Figure S14. AE N°24 sampled during KB2017606 experiment.

## S9. HM2016611

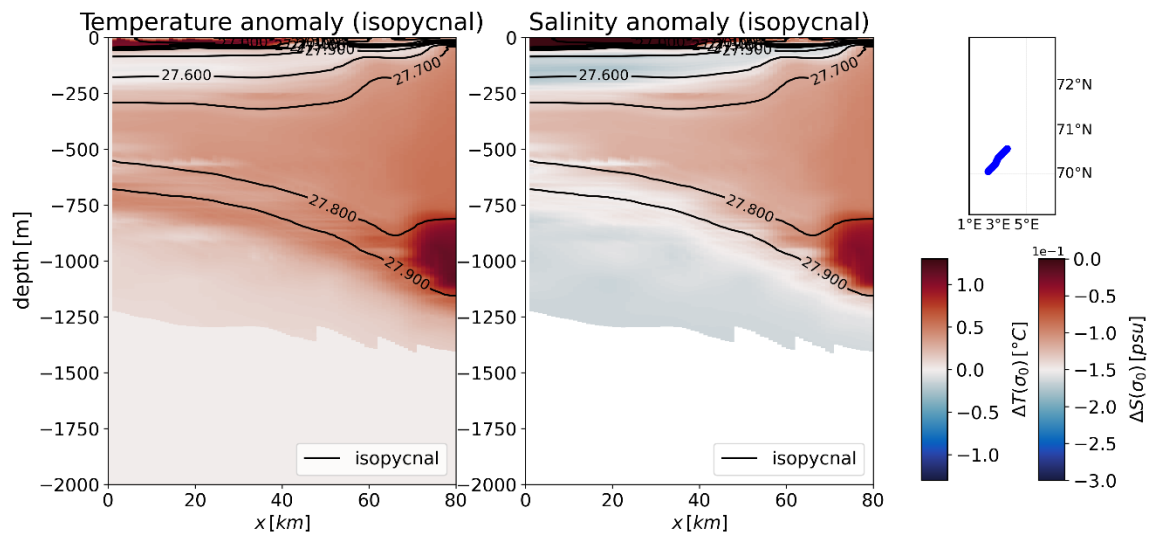

**Figure S15.** AE N°25 sampled during HM2016611 experiment.
